# Supplementary material for: The effects of down- and up-conversion on dual-mode green luminescence from Yb3+- and Tb3+-doped LaPO4 nanocrystals
Source: Royal Society of Chemistry journal article supplement (doi:10.1039/c3tc31100g), 2013-01-01
Supplement: c3tc31100g.pdf [file c3tc31100g.pdf]

## Supporting information

### The effects of down- and up-conversion on dual-mode green luminescence from Yb<sup>3+</sup>- and Tb<sup>3+</sup>-doped LaPO<sub>4</sub> nanocrystals

Tomasz Grzyb<sup>1\*</sup>, Aleksandra Gruszczyńska<sup>1</sup>, Rafał J. Wiglusz<sup>2</sup>, Stefan Lis<sup>1</sup>

<sup>1</sup>Adam Mickiewicz University, Faculty of Chemistry, Department of Rare Earths, Grunwaldzka 6, 60-780 Poznań, Poland. E-mail: tgrzyb@amu.edu.pl; Fax: +48 618291505; Tel: +48 618291346

<sup>2</sup>Institute of Low Temperature and Structure Research, Polish Academy of Sciences, P.O. Box 1410, 50-950 Wrocław, Poland

Corresponding author: tgrzyb@amu.edu.pl

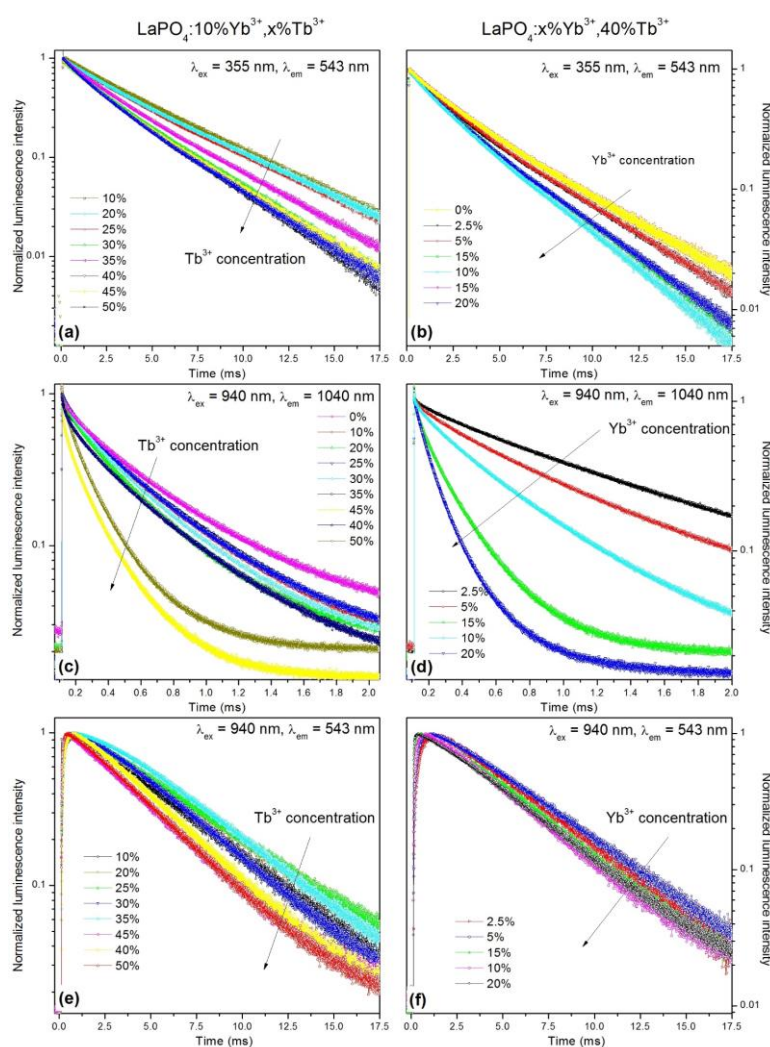

**Fig. S1.** Luminescence decays of LaPO<sub>4</sub>:Tb<sup>3+</sup>, Yb<sup>3+</sup> nanocrystals during the observation of Tb<sup>3+</sup> emission (a, b, e, f) and Yb<sup>3+</sup> emission (c, d), which are dependent on the Tb<sup>3+</sup> (a, c, e) or Yb<sup>3+</sup> (b, d, f) concentrations.
